# Supplementary material
Source: MDPI journal article supplement (https://www.mdpi.com/1873-149X/28/2/20)
Supplement: s1 [file s1]

Supplemental Figure

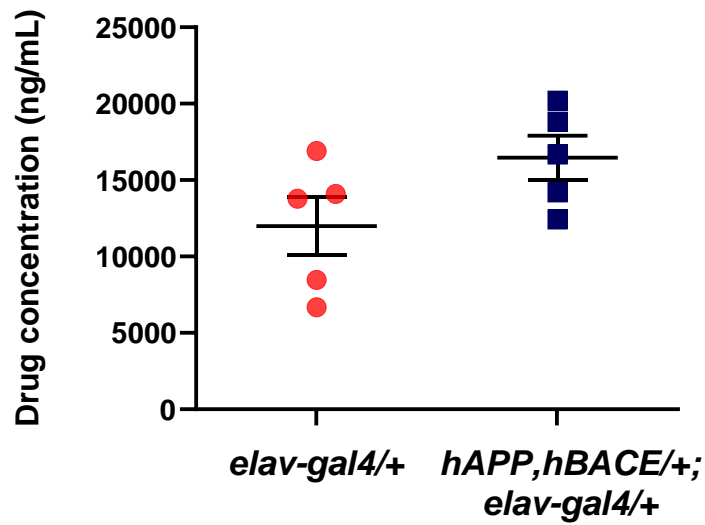

**Figure S1.** *Lisinopril concentration in whole body homogenates.* Concentration of lisinopril was not different between genotypes. Data points show unadjusted values.
